# Supplementary material for: A rather facile strategy for the fabrication of PEGylated AIE nanoprobes
Source: Royal Society of Chemistry journal article supplement (doi:10.1039/c5py00735f), 2015-01-01
Supplement: c5py00735f1.pdf [file c5py00735f1.pdf]

**A Rather Facile Strategy for Fabrication of PEGylation AIE Nanoprobes**

Qing Wan<sup>a</sup>, Ke Wang<sup>b</sup>, Huilin Du<sup>a</sup>, Hongye Huang<sup>a</sup>, Meiying Liu<sup>a</sup>, Fengjie Deng<sup>a</sup>,  
Yanfeng Dai<sup>a</sup>, Xiaoyong Zhang<sup>a,\*</sup> and Yen Wei<sup>b,\*</sup>

<sup>a</sup> Department of Chemistry and Jiangxi Provincial Key Laboratory of New Energy  
Chemistry, Nanchang University, 999 Xuefu Avenue, Nanchang 330031, China

<sup>b</sup> Department of Chemistry and the Tsinghua Center for Frontier Polymer Research,  
Tsinghua University, Beijing, 100084, P. R. China.

Xiaoyong Zhang, Nanchang University, Email: [xiaoyongzhang1980@gmail.com](mailto:xiaoyongzhang1980@gmail.com);

Yen Wei, Tsinghua University, Email: [weiyen@tsinghua.edu.cn](mailto:weiyen@tsinghua.edu.cn).

## Results

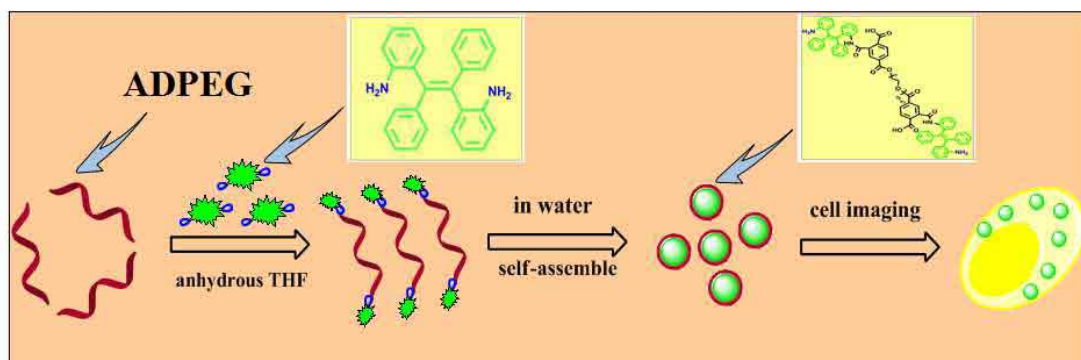

**Scheme S1.** Schematic showing the fabrication of PEG-TPE FNPs and their utilization for bioimaging applications.

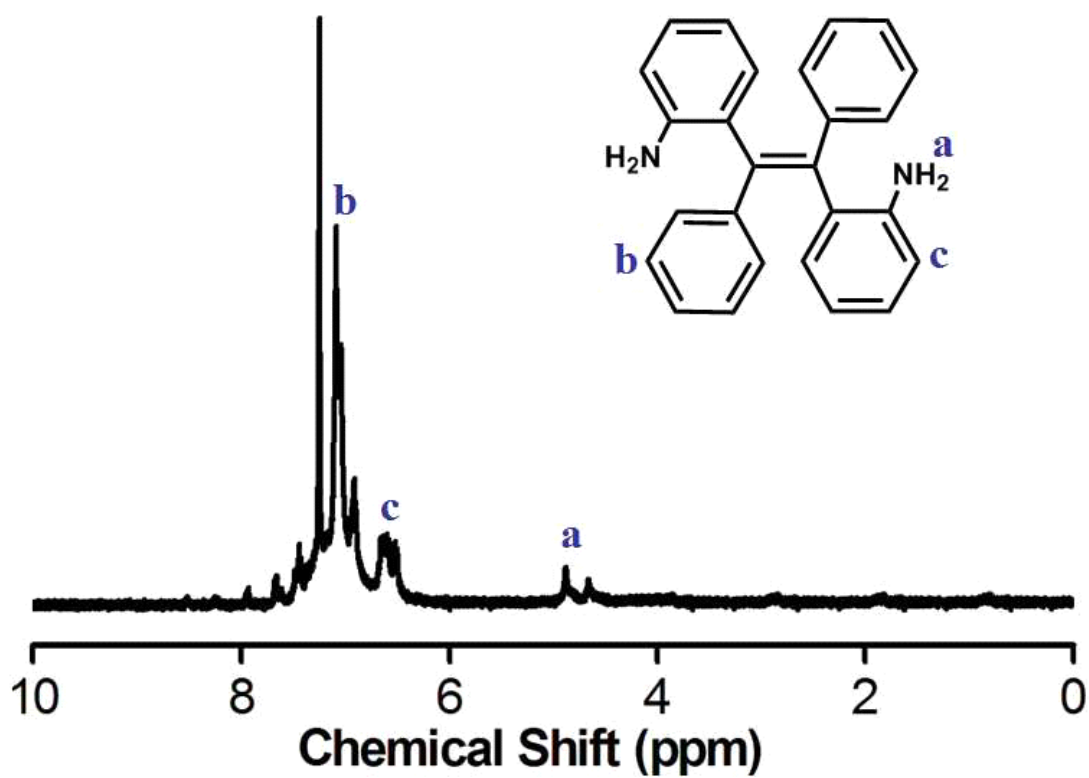

**Fig. S1** The representative curve of <sup>1</sup>H NMR demonstrating the successful synthesis of 2,2'-diaminotetraphenyl ethylene (DATPE).

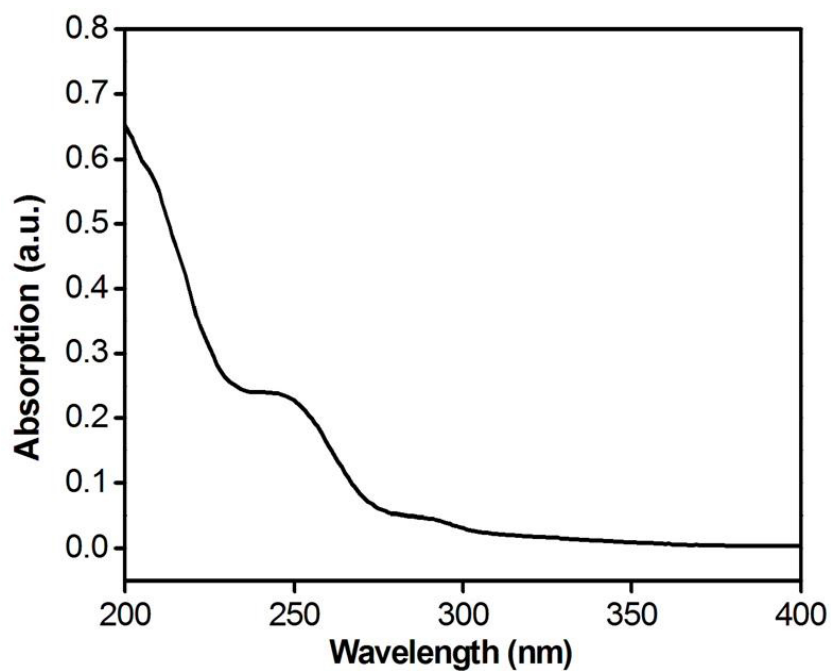

Fig. S2 UV-Vis spectrum of PEG-TPE FNP in water.

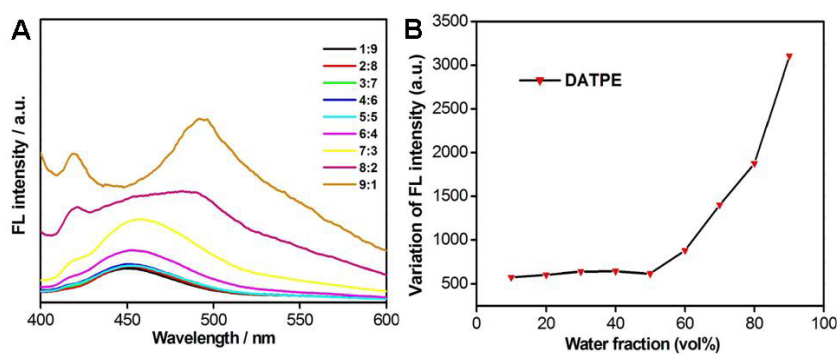

Fig. S3 (A) the PL spectra of DATPE in water/THF (V/V) mixture with different water fraction; Ex = 333 nm (10  $\mu$ M). (B) The variation trend of DATPE FL intensity in water/THF mixture with different water fraction.

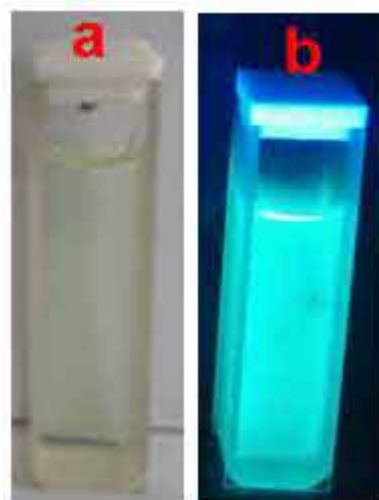

Fig. S4 Photographs of PEG-TPE FNP dispersed in water (a) and

irradiated with Uv lamp at 365 nm.

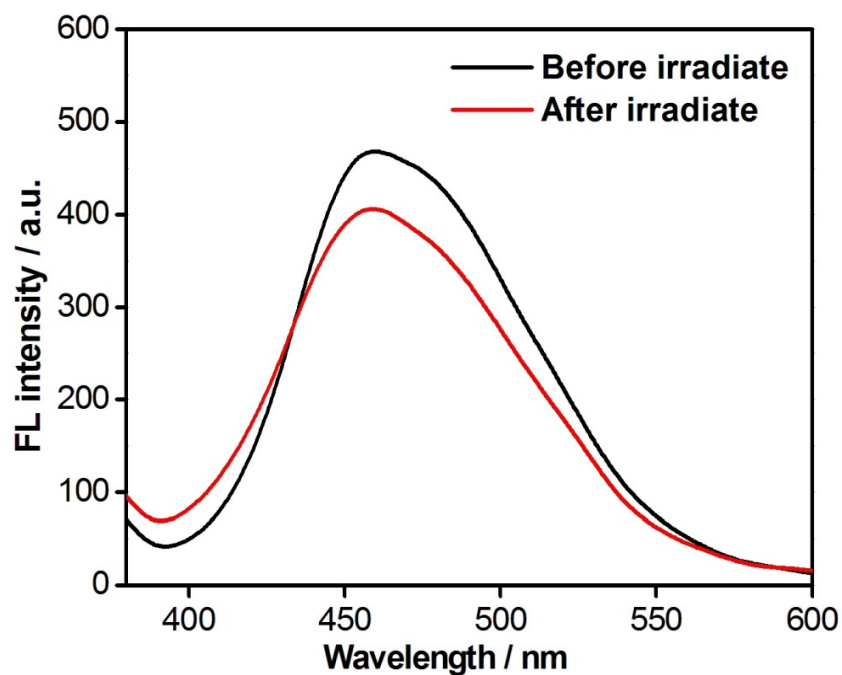

**Fig. S5** Photostability of PEG-TPE FNPs after irradiated with Uv lamp for 1 h (365 nm).

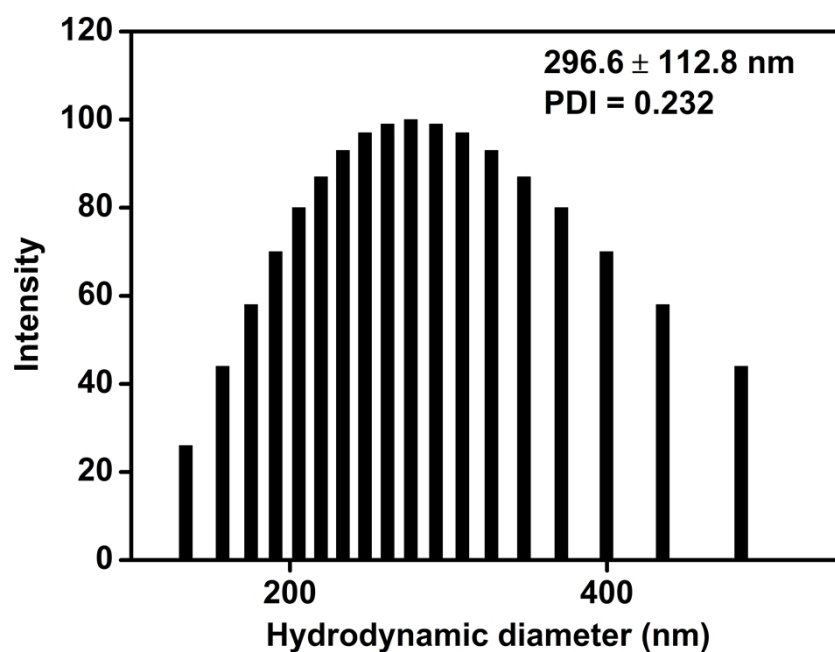

**Fig. S6** Hydrodynamic size of PEG-TPE FNPs in water.
